# Supplementary material
Source: PubMed Central journal article supplement (PMC4013492)

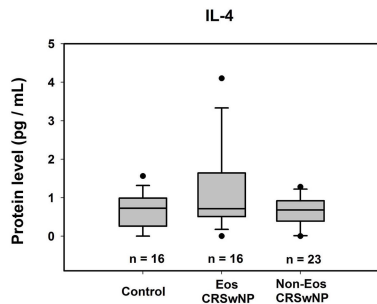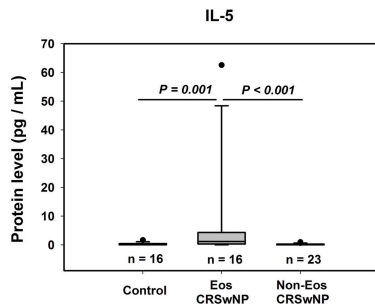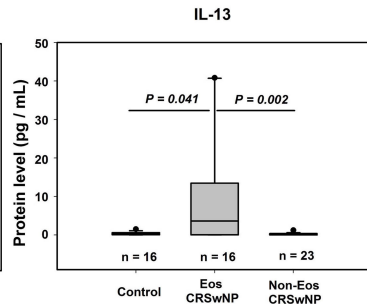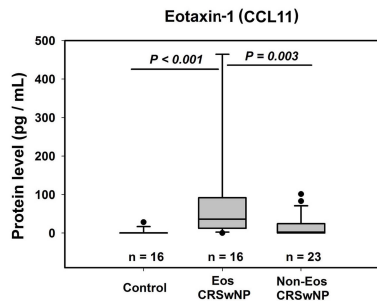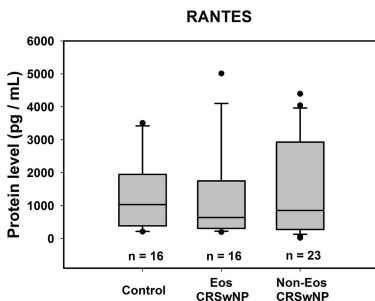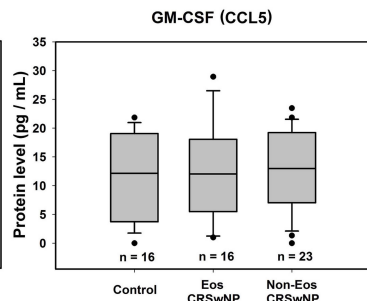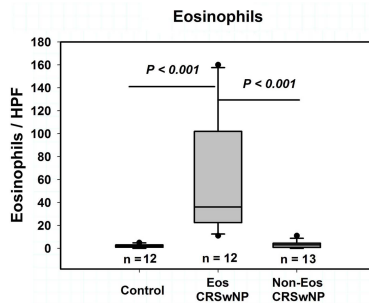

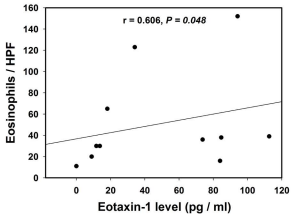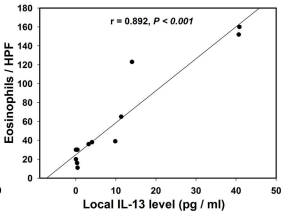

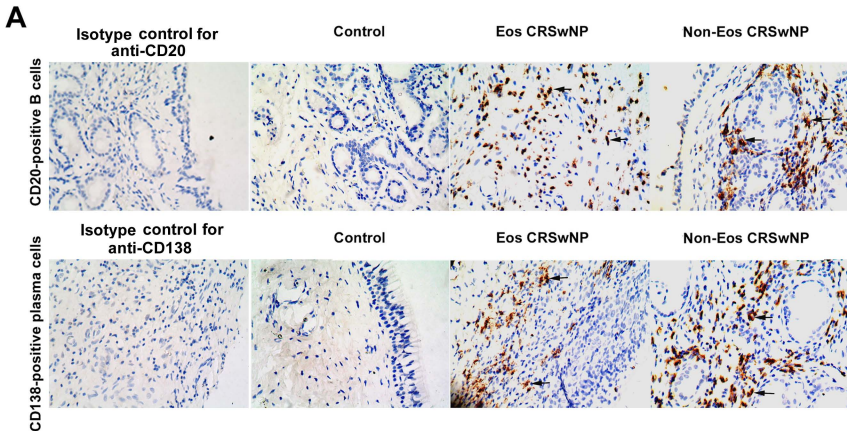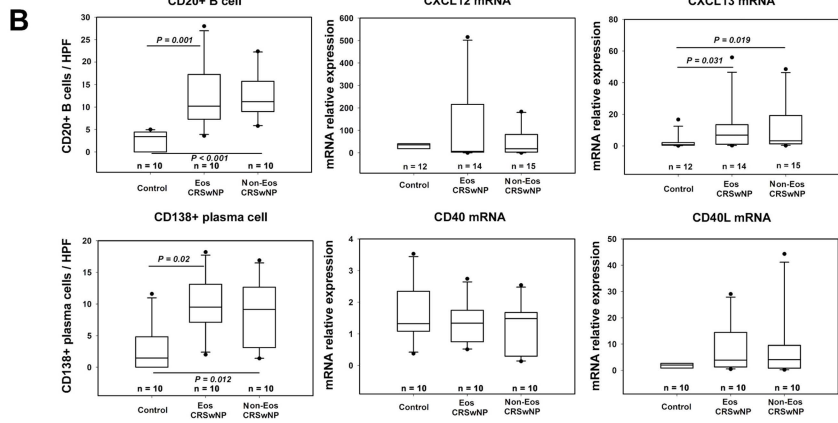

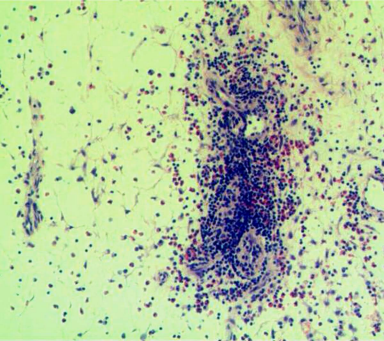

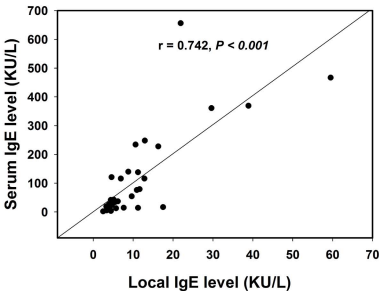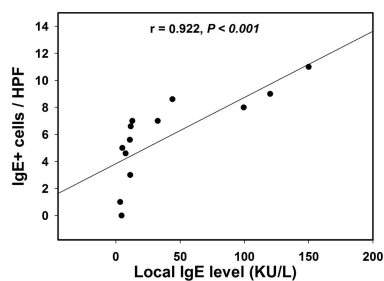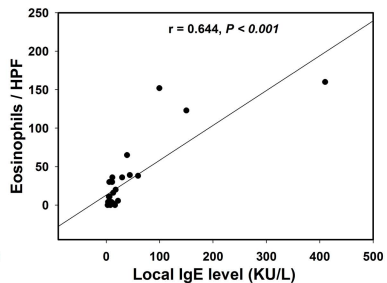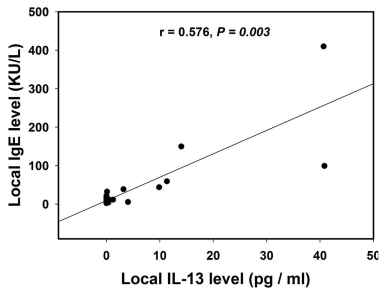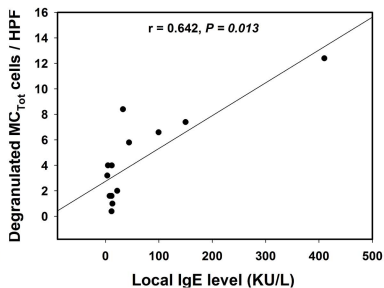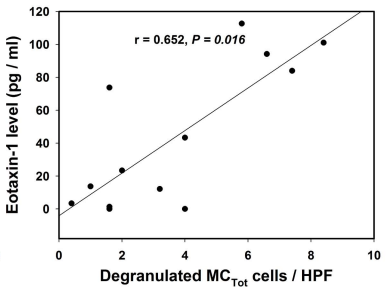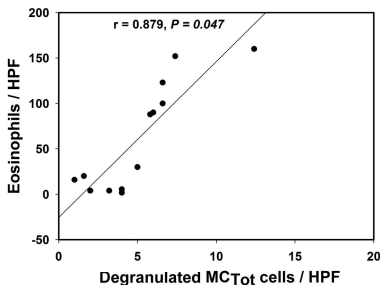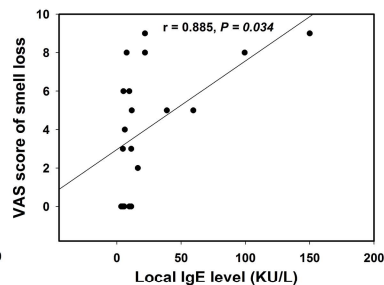

**MC<sub>Tot</sub> in the LP (Anti-Trypsin IHC)**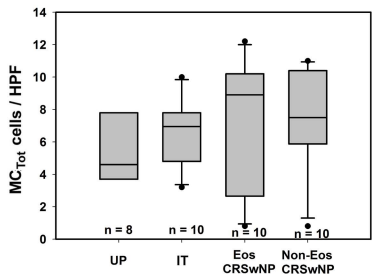**MC<sub>TC</sub> in the LP (Anti-Chymase IHC)**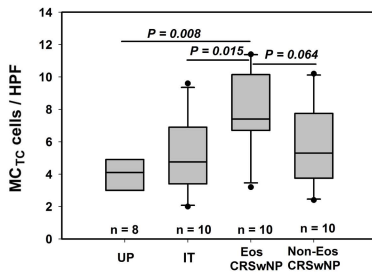**MC<sub>TC</sub> / MC<sub>Tot</sub> in the LP**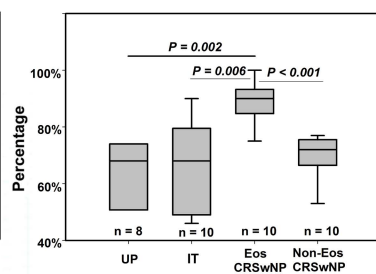**MC<sub>Tot</sub> in the epithelium (Anti-Trypsin IHC)**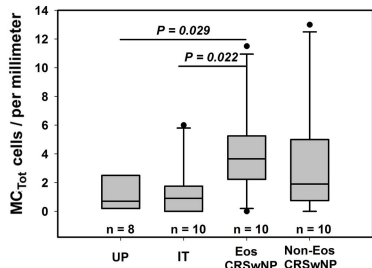**MC<sub>TC</sub> in the epithelium (Anti-Chymase IHC)**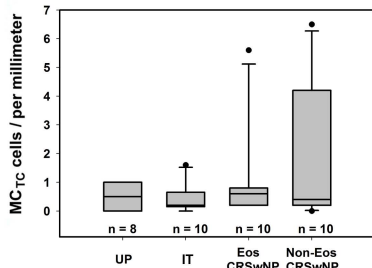**MC<sub>TC</sub> / MC<sub>Tot</sub> in the epithelium**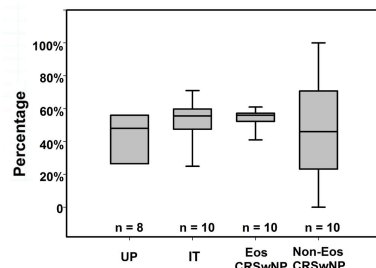**Activated MC<sub>Tot</sub> (Anti-Trypsin IHC)**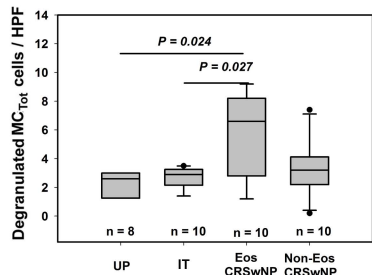**IgE-positive cells**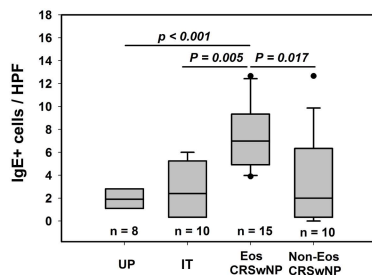**FCεRI-positive cells**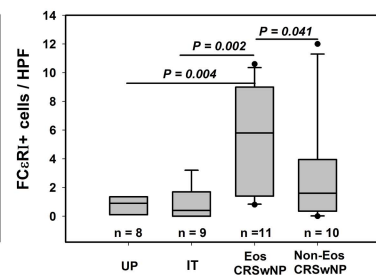**Local IgE level**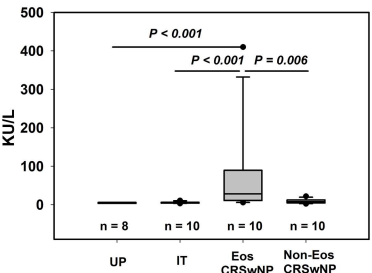

Supplement: NIHMS573601-supplement-Supp_FigureS1-S6.pdf [file NIHMS573601-supplement-Supp_FigureS1-S6.pdf]
